# Supplementary material for: Androgen Receptor and Poly(ADP-ribose) Glycohydrolase Inhibition Increases Efficiency of Androgen Ablation in Prostate Cancer Cells
Source: PubMed Central journal article supplement (PMC7052214; doi:10.1038/s41598-020-60849-y), 2020-03-02
Supplement: 41598_2020_60849_MOESM1_ESM.pdf [file 41598_2020_60849_MOESM1_ESM.pdf]

# Androgen Receptor and Poly(ADP-ribose) Glycohydrolase Inhibition Increases Efficiency of Androgen Ablation in Prostate Cancer Cells

Manqi Zhang<sup>1</sup>, Yanhao Lai<sup>2,3</sup>, Judy L Vasquez<sup>4</sup>, Dominic I James<sup>5</sup>, Kate M Smith<sup>5</sup>, Ian D Waddell<sup>5,6</sup>, Donald J Ogilvie<sup>5</sup>, Yuan Liu<sup>2,3</sup> and Irina U Agoulnik<sup>3,4,7,\*</sup>

<sup>1</sup>Biochemistry Ph.D. Program, Florida International University, Miami, FL, USA

<sup>2</sup>Department of Chemistry and Biochemistry, College of Arts, Sciences and Education, Florida International University, Miami, FL, USA.

<sup>3</sup>Biomolecular Sciences Institute, Florida International University, Miami, FL, USA

<sup>4</sup>Department of Human and Molecular Genetics, Herbert Wertheim College of Medicine, Florida International University, Miami, FL, USA.

<sup>5</sup>Cancer Research UK Manchester Institute, The University of Manchester, Alderley Park, SK10 4TG, U.K.

<sup>6</sup>Current address: CRL, Chesterford Research Park, CB10 1XL, UK

<sup>7</sup>Department of Cellular and Molecular Biology, Baylor College of Medicine, Houston, TX.

**\*Corresponding Author:** Irina U. Agoulnik, PhD, Department of Human and Molecular Genetics, Herbert Wertheim College of Medicine, Florida International University, 11200 SW 8<sup>th</sup> Street, Miami, FL 33199, USA. [Irina.Agoulnik@fiu.edu](mailto:Irina.Agoulnik@fiu.edu). Phone: 305-348-1475, Fax: 305-348-0688

| Gene                | Forward                   | Reverse                 | Probe |
|---------------------|---------------------------|-------------------------|-------|
| <b>18S</b>          | gcaattattccccatgaacg      | gggacttaatcaacgcaagc    | 48    |
| <b>AR</b>           | gccttgctctctagcctcaa      | gtcgtccacgtgtaagttgc    | 14    |
| <b>INPP4B</b>       | tgtctgatgctgacgctaaga     | ccacaaaccaatccagcaa     | 41    |
| <b>PARG</b>         | tctgccaatcacacagtaactattc | taatgtgttgaaaaggtttagga | 2     |
| <b>TMPRSS2</b>      | ctgatcacaccagccatgat      | tatcccctatcagccaccag    | 4     |
| <b>UGT2B17</b>      | tgtcagaagaaagtgccaaca     | gccatcaaatctccatagaacc  | 61    |
| <b>PARG</b>         | aaagcgcattacttcaaaaactg   | gcaagtcaggatccaagagaa   | 16    |
| <b>PSA promoter</b> | cccctgttctgtttcatcc       | gcctgtagctcatggagac     | 82    |

**Supplemental Table 1.** qPCR primer sequences and corresponding probes used to analyze gene expression.



## Supplementary Figure S2

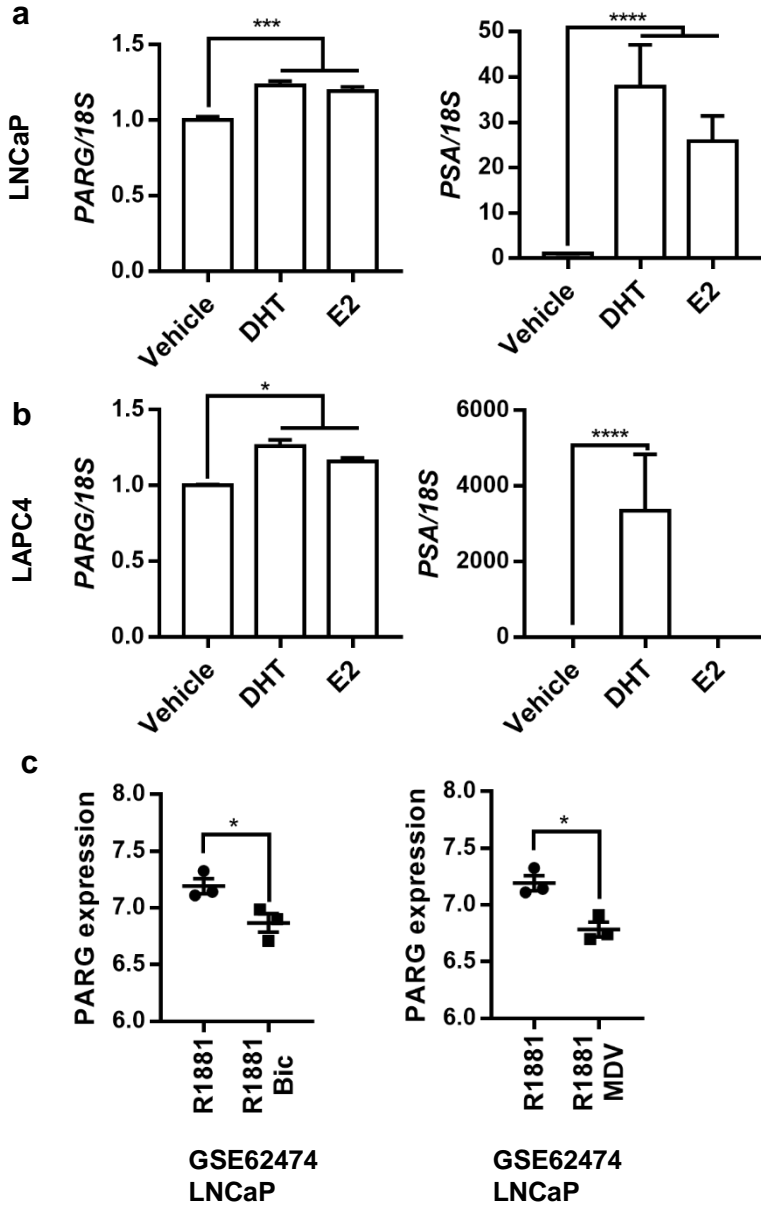

**Supplementary Figure S2.** LNCaP (a) or LAPC4 (b) cells were placed in medium supplemented with 10% CSS. Next day cells were treated with 100 nM dihydrotestosterone (DHT) or 100 nM estradiol (E2) as indicated for additional 72 hours. RNA was analyzed for expression of *PARG* and *PSA*. Expression was normalized to *18S*. Each bar is an average of 3 biological replicates. The experiments were performed 3 times. (c) *PARG* expression in LNCaP cells treated 24 hours with R1881 or R1881 plus bicalutamide (Bic, left) or enzalutamide (MDV, right) for 24 hours. Data were acquired from GSE62474.

## Supplementary Figure S3

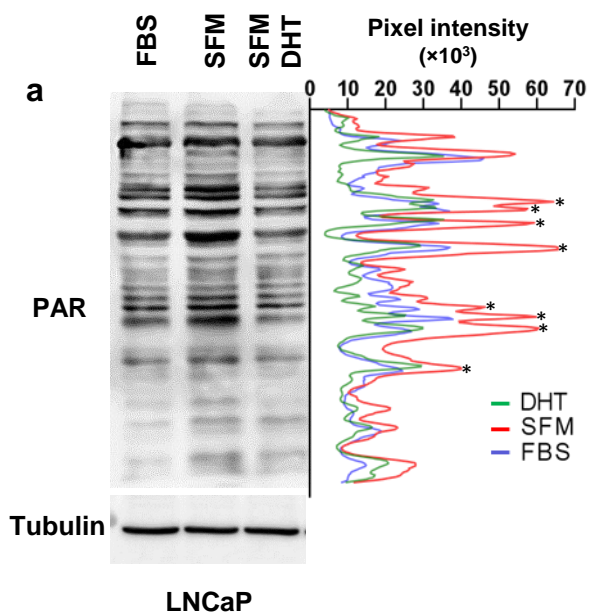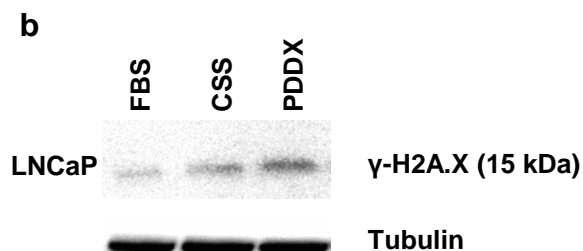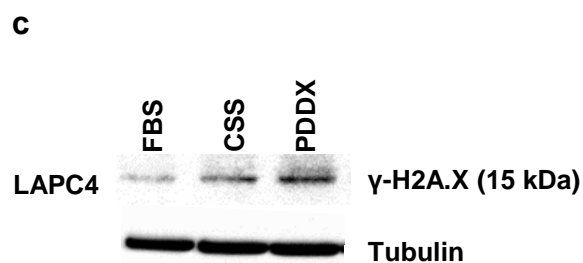

**Supplementary Figure S3.** A. LNCaP cells were placed in RPMI medium with 10% FBS or serum-free medium (SFM). Cells were treated with vehicle or 10 nM DHT as indicated for 5 days. Protein levels of PAR and tubulin were assessed by Western blotting and the densitometry profile of PAR is shown. Three measurements of signal intensities were performed along each line and averaged and normalized to signal intensity of the tubulin band. PAR intensities that were significantly changed from FBS control ( $p < 0.05$ ) were marked with an asterisk \*. The experiment was performed 3 times.

## Supplementary Figure S4

| PDD00017272 Properties                                                                           |                                                                                                                                                                                                                                                                                                                                                                                                                                                                                                     |
|--------------------------------------------------------------------------------------------------|-----------------------------------------------------------------------------------------------------------------------------------------------------------------------------------------------------------------------------------------------------------------------------------------------------------------------------------------------------------------------------------------------------------------------------------------------------------------------------------------------------|
| Structure                                                                                        | 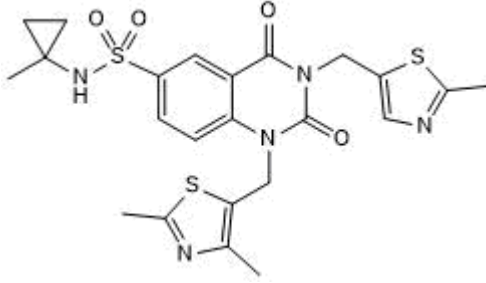 <p>The chemical structure of PDD00017272 features a central benzimidazole ring system. It is substituted with a tert-butylsulfonamide group at the 2-position, a 2-methyl-1,3,4-thiazol-5-ylmethyl group at the 4-position, and a 2,4,6-trimethyl-1,3,4-thiazol-5-ylmethyl group at the 5-position. The benzimidazole ring also has a carbonyl group at the 2-position and a methyl group at the 4-position.</p> |
| Solubility in PBS + 1% DMSO ( $\mu\text{M}$ )                                                    | 5.2                                                                                                                                                                                                                                                                                                                                                                                                                                                                                                 |
| Solubility in DMSO (mM)                                                                          | 20                                                                                                                                                                                                                                                                                                                                                                                                                                                                                                  |
| PARG Biochemical EC <sub>50</sub> ( $\mu\text{M}$ )                                              | 0.0048                                                                                                                                                                                                                                                                                                                                                                                                                                                                                              |
| PARG Cell EC <sub>50</sub> ( $\mu\text{M}$ )                                                     | 0.0092                                                                                                                                                                                                                                                                                                                                                                                                                                                                                              |
| Cytotoxicity ( $\mu\text{M}$ ) (HeLa)                                                            | >30                                                                                                                                                                                                                                                                                                                                                                                                                                                                                                 |
| Lipophilicity (XLogP)                                                                            | 4.7                                                                                                                                                                                                                                                                                                                                                                                                                                                                                                 |
| Intrinsic Clearance CL <sub>int</sub> ( $\mu\text{L}/\text{min}/\text{mg}$ ) (human hepatocytes) | 135                                                                                                                                                                                                                                                                                                                                                                                                                                                                                                 |
| Half Life (human hepatocytes)                                                                    | 10 min                                                                                                                                                                                                                                                                                                                                                                                                                                                                                              |

Supplementary Figure S4. Biochemical properties of PDD00017272

# Supplementary Figure S5

## Figure 1

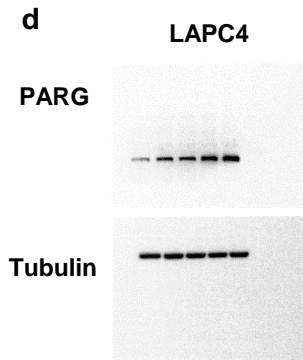

## Figure 1

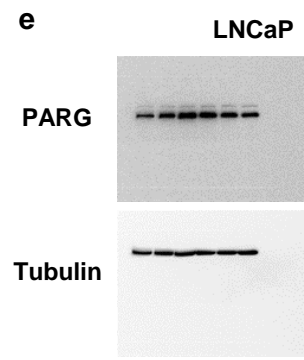

## Figure 2

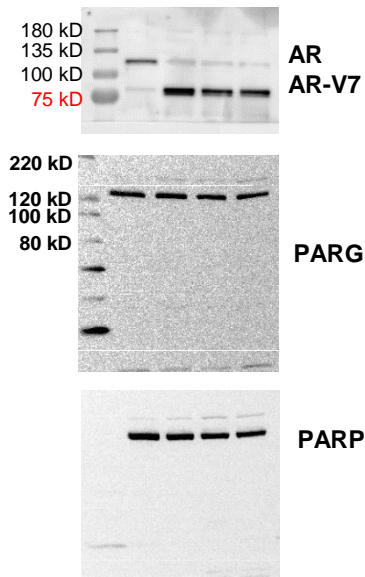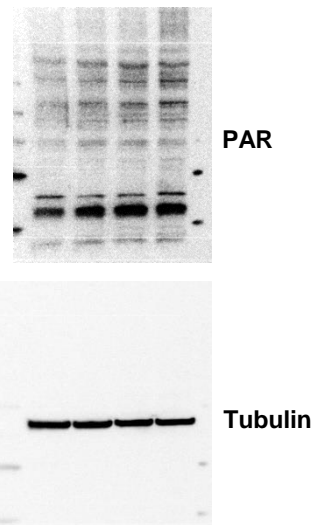

## Figure 3

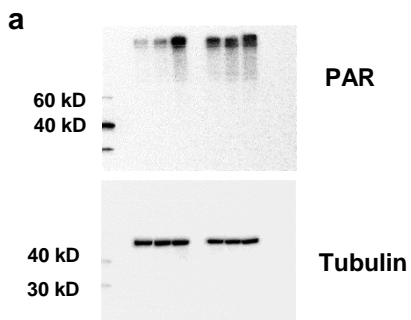

## Figure 3

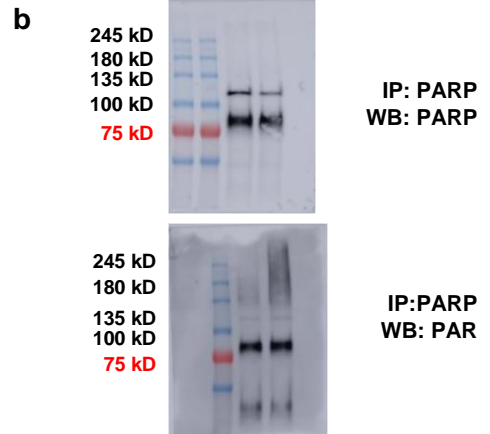

Supplementary Figure S5 continue

Figure 5

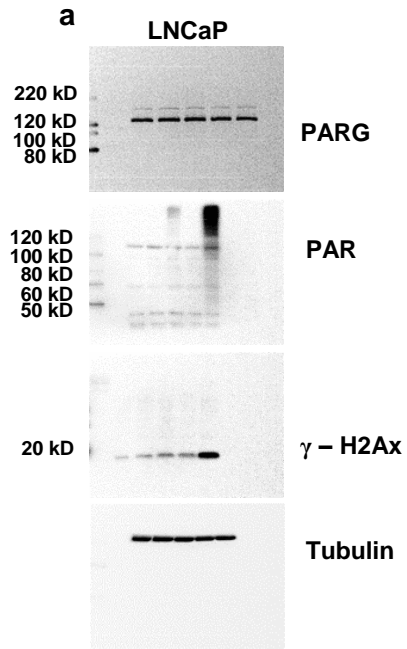

Figure 5

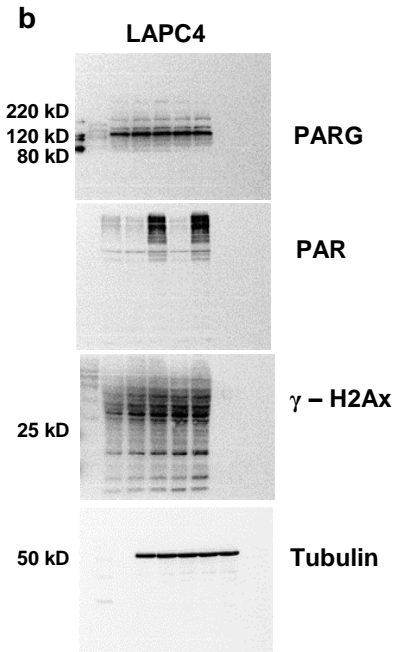

Supplementary Figure S5. Full length images of cropped blots presented in Figures 1, 2, 3 and 5.

## Supplementary Figure S6

| Abbreviation   | Definition                                         |
|----------------|----------------------------------------------------|
| APE1           | Apurinic/pyrimidinic endonuclease 1                |
| AR             | Androgen receptor                                  |
| ARH1           | ADP-Ribosylarginine Hydrolase 1                    |
| ARH3           | ADP-Ribosylarginine Hydrolase 3                    |
| BER            | Base excision repair                               |
| ChIP Assay     | Chromatin ImmunoPrecipitation Assay                |
| CRPC           | castration-resistant prostate cancer               |
| CSS            | Charcoal Stripped Serum                            |
| DSB            | double stranded breaks                             |
| ERG            | ETS Transcription Factor                           |
| FBS            | Fetal Bovine Serum                                 |
| FoxA1          | Forkhead Box A1                                    |
| KDM4D          | Lysine Demethylase 4D                              |
| LIG III        | DNA Ligase 3                                       |
| PAR            | poly ADP-Ribose                                    |
| PARG           | Poly(ADP-ribose) glycohydrolase                    |
| PARP           | poly(ADP-ribose) polymerase                        |
| Pol $\beta$    | polimerase $\beta$                                 |
| RAR            | Retinoic Acid Receptor                             |
| SSB            | Single Strand Break                                |
| TMPRSS2        | Transmembrane Serine Protease 2                    |
| TMZ            | temozolomide                                       |
| UGT2B17        | UDP Glucuronosyltransferase Family 2 Member B17    |
| XRCC1          | X-Ray Repair Cross Complementing 1                 |
| $\gamma$ H2A.X | Phosphorylated form of H2A histone family member X |

Supplementary Figure S6. Abbreviations.
